# Supplementary material for: Fabrication of lead-free CsBi3I10 based compact perovskite thin films by employing solvent engineering and anti-solvent treatment techniques: an efficient photo-conversion efficiency up to 740 nm
Source: Royal Society of Chemistry journal article supplement (doi:10.1039/d0se00786b), 2020-01-01
Supplement: d0se00786b1.pdf [file d0se00786b1.pdf]

## Supporting Information

### **Fabrication of lead-free CsBi<sub>3</sub>I<sub>10</sub> based compact perovskite thin films by employing solvent engineering and anti-solvent treatment techniques: An efficient photo-conversion efficiency up to 740nm**

Pandiyarajan Mariyappan<sup>a,b</sup>, Towhid H. Chowdhury<sup>a</sup>, Shanthi Subashchandran<sup>b\*</sup>, Idriss Bedja<sup>c</sup>, Hamid M. Ghaithan<sup>c</sup>, Ashraful Islam<sup>a\*</sup>

<sup>a</sup> Photovoltaic Materials Group, Center for Green Research on Energy and Environment Materials, National Institute for Materials Science, 1-2-1 Sengen, Tsukuba, Ibaraki 305-0047, Japan.

<sup>b</sup> Crystal Growth Centre, Anna University, Chennai- 600025, Tamil Nadu, India.

<sup>c</sup> Cornea Research Chair, Optometry Department, College of Applied Medical Sciences, King Saud University, Riyadh 11433, Saudi Arabia

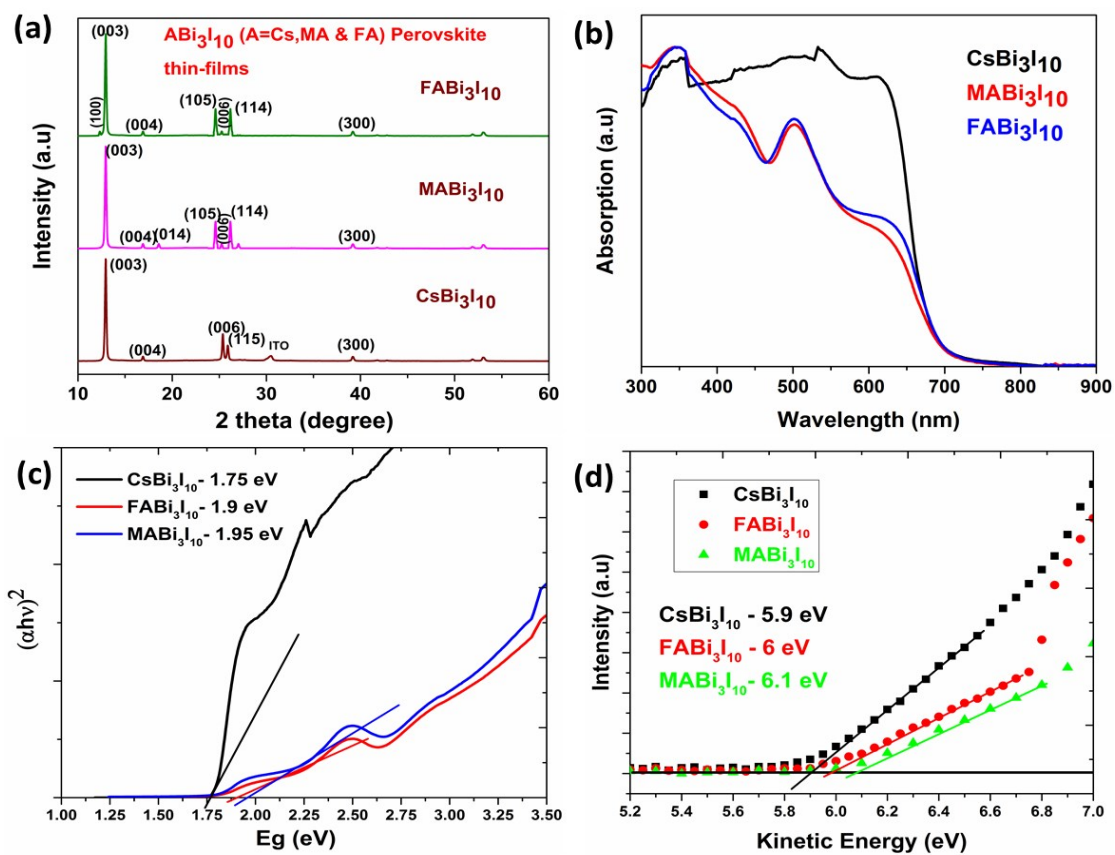

**Figure S1.** (a) X-Ray Diffraction pattern, (b) UV- Visible absorption spectrum, (c) Tauc plot and (d) work function measurement for the ABi<sub>3</sub>I<sub>10</sub>, (A= Cs, MA and FA) perovskite thin-films.

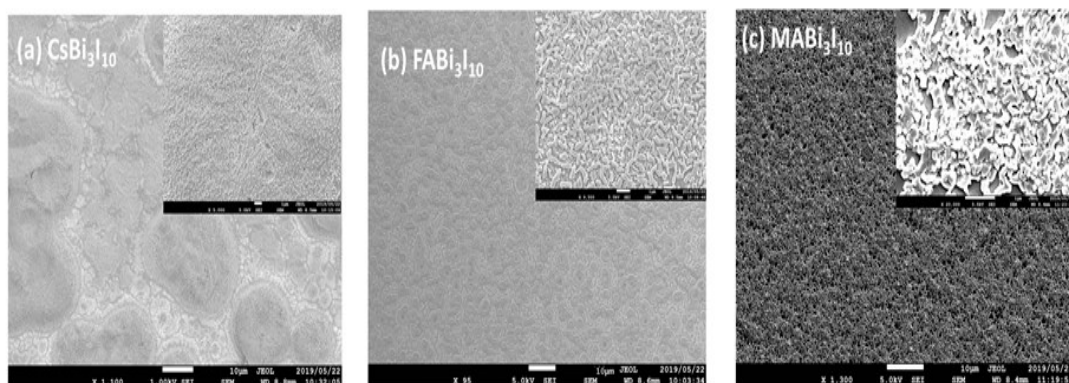

**Figure S2.** SEM surface images of (a) CsBi<sub>3</sub>I<sub>10</sub>, (b) FABi<sub>3</sub>I<sub>10</sub>, (c) MABi<sub>3</sub>I<sub>10</sub> perovskite thin-films

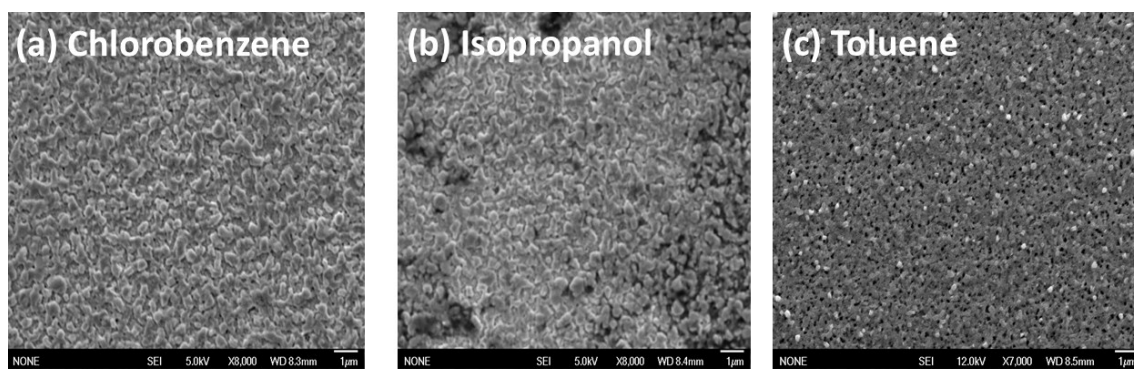

**Figure S3.** Higher magnification SEM surface images of (a) Chlorobenzene, (b) Isopropanol, (c) Toluene anti-solvents treated perovskite thin-films

Table ST1 : Device performance comparison of the PSCs fabricated with CsBi<sub>3</sub>I<sub>10</sub> perovskite material as absorber.<sup>a</sup>

| Devices                          | J <sub>sc</sub> (mA/cm <sup>2</sup> ) | V <sub>oc</sub> (V) | Fill factor | η (%) |
|----------------------------------|---------------------------------------|---------------------|-------------|-------|
| <b>Chlorobenzene<sup>b</sup></b> |                                       |                     |             |       |
| Device 1                         | 2.200                                 | 0.651               | 0.271       | 0.38  |
| Device 2                         | 1.989                                 | 0.633               | 0.224       | 0.28  |
| Device 3                         | 1.890                                 | 0.492               | 0.263       | 0.24  |
| <b>Toluene<sup>b</sup></b>       |                                       |                     |             |       |
| Device 1                         | 1.168                                 | 0.533               | 0.210       | 0.13  |
| Device 2                         | 1.224                                 | 0.439               | 0.180       | 0.10  |
| Device 3                         | 1.286                                 | 0.521               | 0.101       | 0.07  |
| <b>Isopropanol<sup>b</sup></b>   |                                       |                     |             |       |
| Device 1                         | 0.818                                 | 0.377               | 0.230       | 0.07  |
| Device 2                         | 0.875                                 | 0.282               | 0.216       | 0.05  |
| Device 3                         | 0.685                                 | 0.304               | 0.202       | 0.04  |
| <b>Only DMF<sup>c</sup></b>      |                                       |                     |             |       |
| Device 1                         | 0.440                                 | 0.279               | 0.227       | 0.03  |
| Device 2                         | 0.416                                 | 0.398               | 0.185       | 0.03  |
| Device 3                         | 0.156                                 | 0.41                | 0.078       | 0.01  |

<sup>a</sup>J-V measured in forward bias. <sup>b</sup> CsBi<sub>3</sub>I<sub>10</sub> layer prepared from 7:3 (DMF:DMSO) solvent ratio and treated with different anti-solvent dripping. <sup>c</sup>CsBi<sub>3</sub>I<sub>10</sub> layer prepared from only DMF solvent and without anti-solvent dripping.
